# Supplementary material for: From Multiplex Serology to Serolomics—A Novel Approach to the Antibody Response against the SARS-CoV-2 Proteome
Source: Viruses. 2021 Apr 24;13(5):749. doi: 10.3390/v13050749 (PMC8147094; doi:10.3390/v13050749)
Supplement: Supplementary file 1 [file viruses-13-00749-s001.zip › viruses-1151347-SI.pdf]

## Supplementary Materials

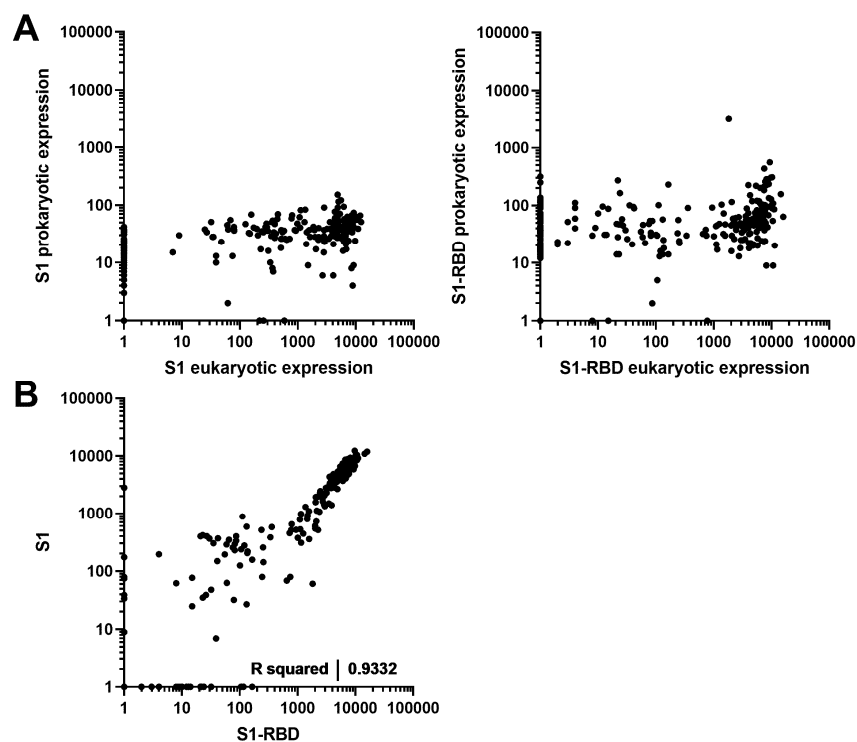

**Figure S1.** Antibody responses to SARS-CoV-2 proteins S1 and S1-RBD in  $n = 174$  serum samples of Covid-19 patients and  $n = 85$  serum samples of pre-pandemic controls. A) Comparison of antibody responses (MFI) to S1 and S1-RBD proteins expressed in HEK293 (eukaryotic expression) to those expressed in *E. coli* BL21 (prokaryotic expression); B) Correlation of antibody responses (MFI) to eukaryotically expressed S1 and S1-RBD; the Pearson correlation coefficient (R squared) is given as a measure for correlation.

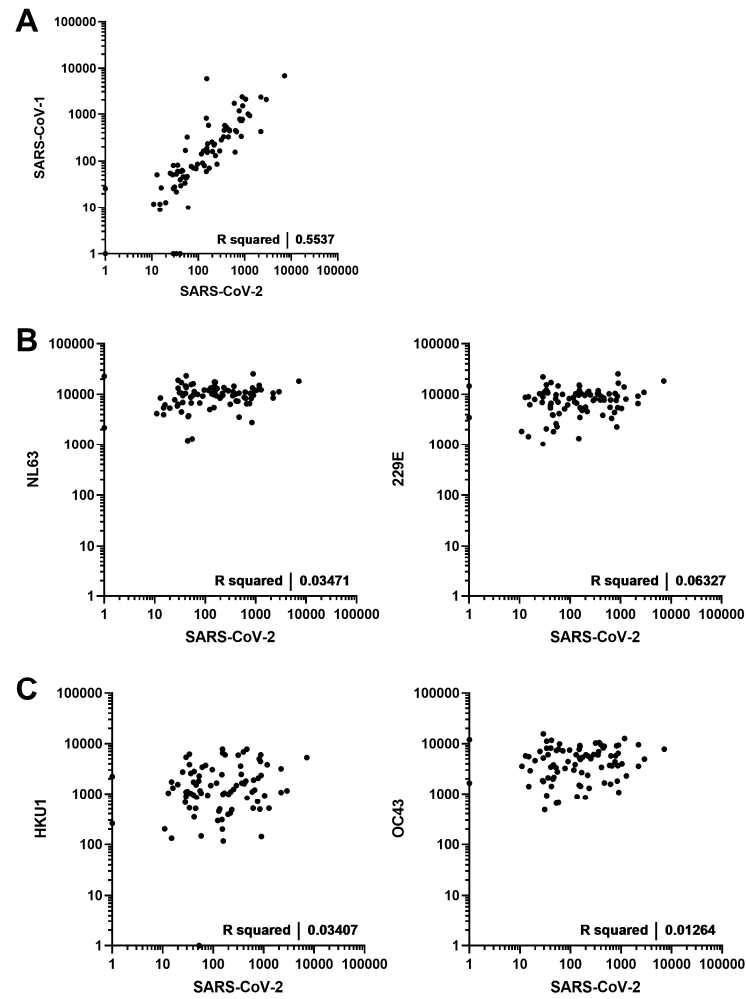

**Figure S2.** Correlation of antibody responses to protein N of SARS-CoV-2 to those of other CoVs. Antibody responses (MFI) to protein N of SARS-CoV-2 are compared to those of SARS-CoV-1 and ccCoVs: A) SARS-CoV-1, B)  $\alpha$ -CoVs NL63 and 229E, and c)  $\beta$ -CoVs OC43 and HKU1. Blood samples were drawn prior to the Covid-19 pandemic ( $n=85$ ). The Pearson correlation coefficient (R squared) is given as a measure for correlation.

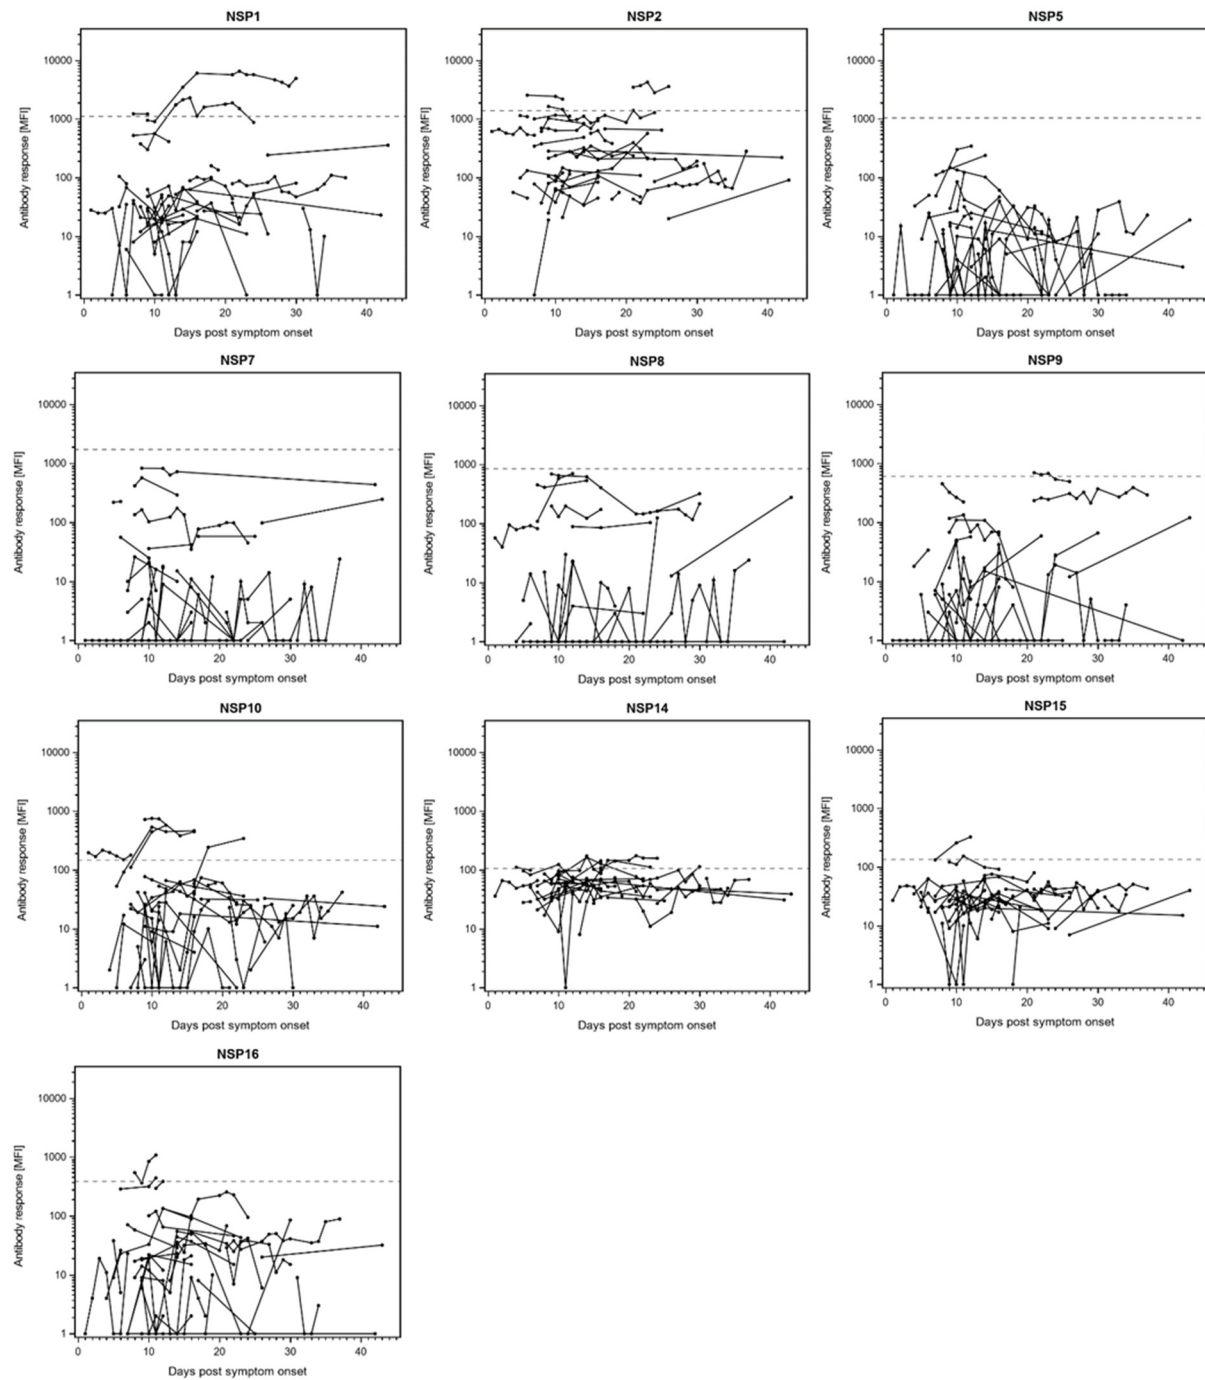

**Figure S3. a:** Antibody responses (IgM/IgA/IgG) to SARS-CoV-2 non-structural proteins in longitudinal samples of  $n = 32$  hospitalized Covid-19 patients. The antibody response (MFI) is plotted against days post symptom onset. The dashed line indicates the antigen-specific cut-off defined as mean plus three times standard deviation in  $n = 85$  pre-pandemic controls.

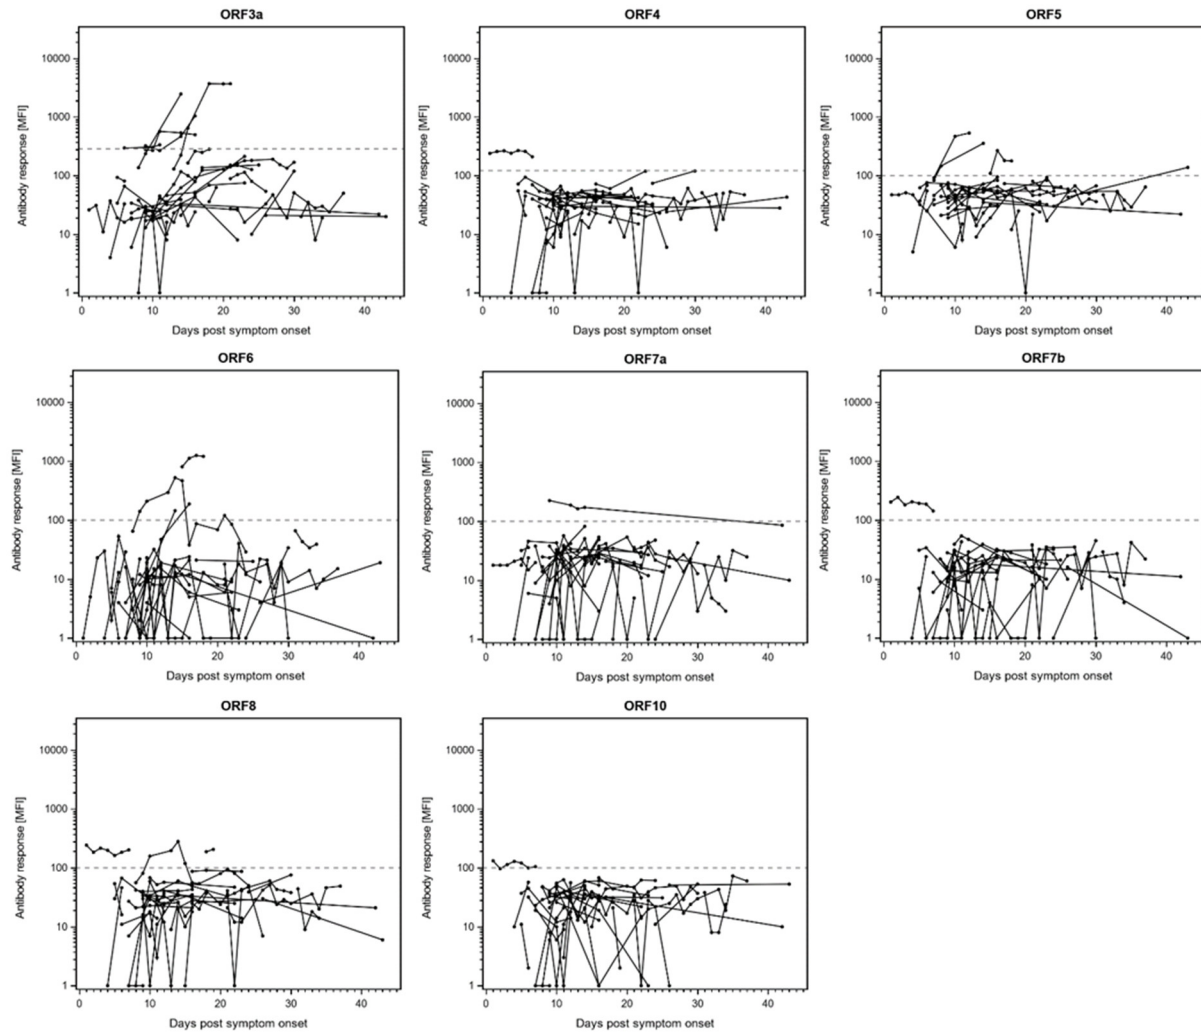

**Figure S3. b:** Antibody responses to SARS-CoV-2 ORF proteins in longitudinal samples of  $n = 32$  hospitalized Covid-19 patients. The antibody response (MFI) is plotted against days post symptom onset. The dashed line indicates the antigen-specific cut-off defined as mean plus three times standard deviation in  $n = 85$  pre-pandemic controls.

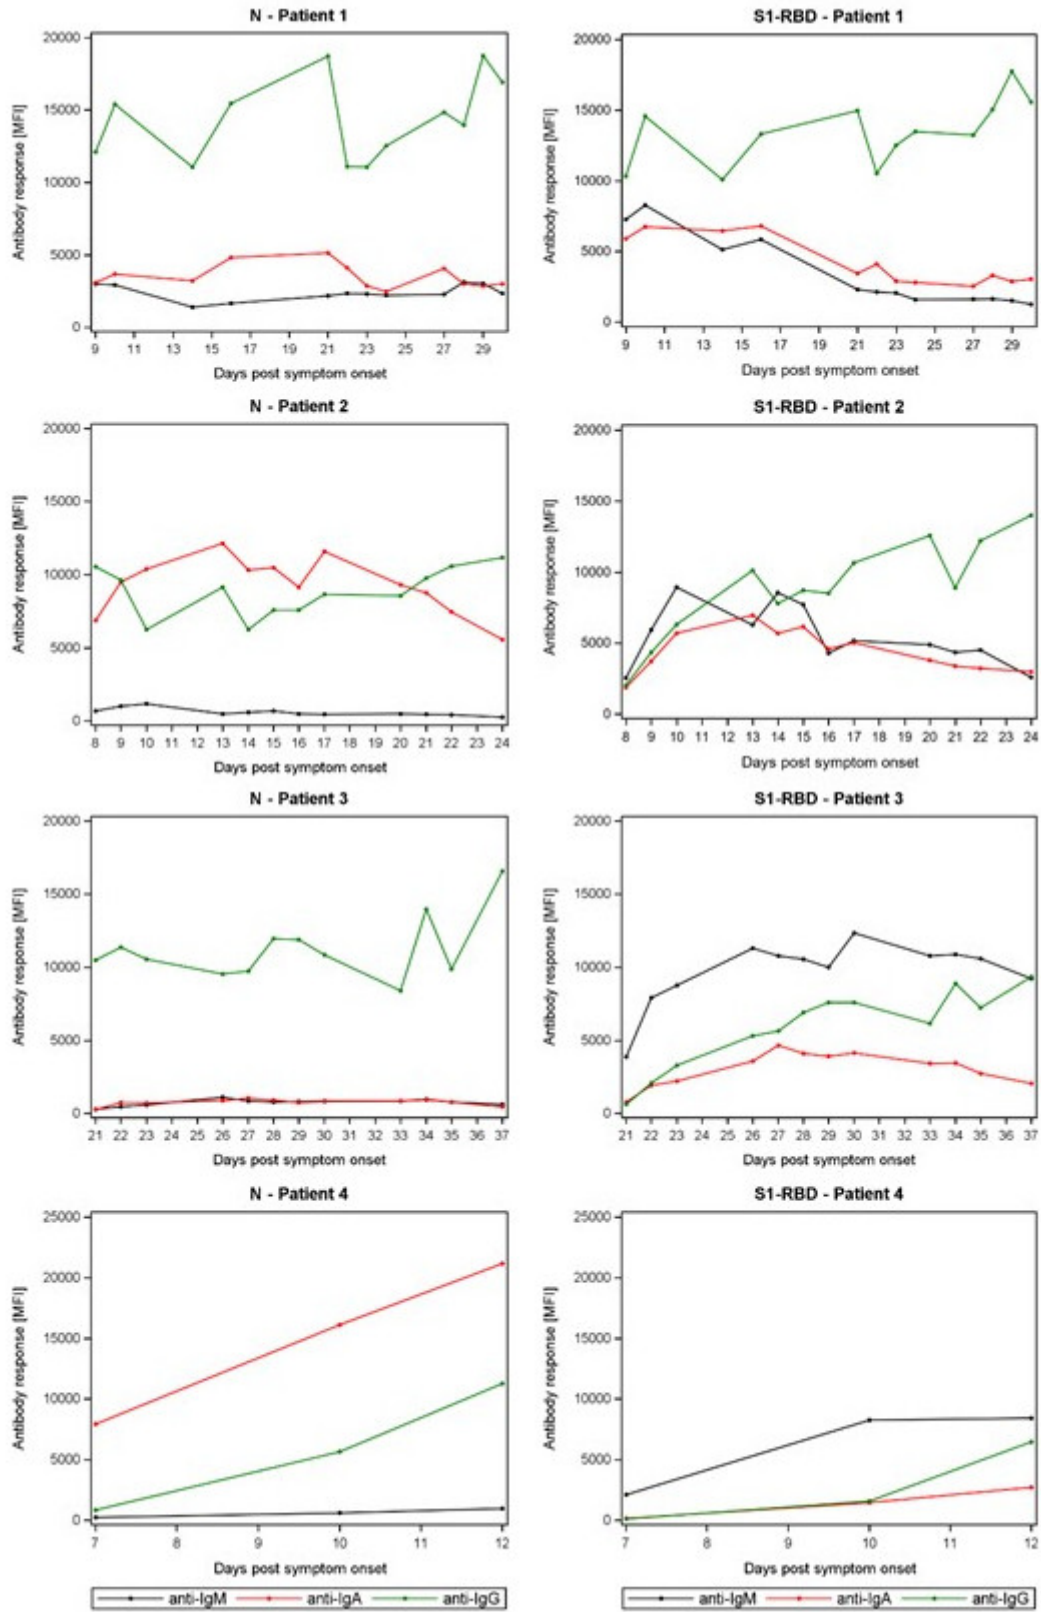

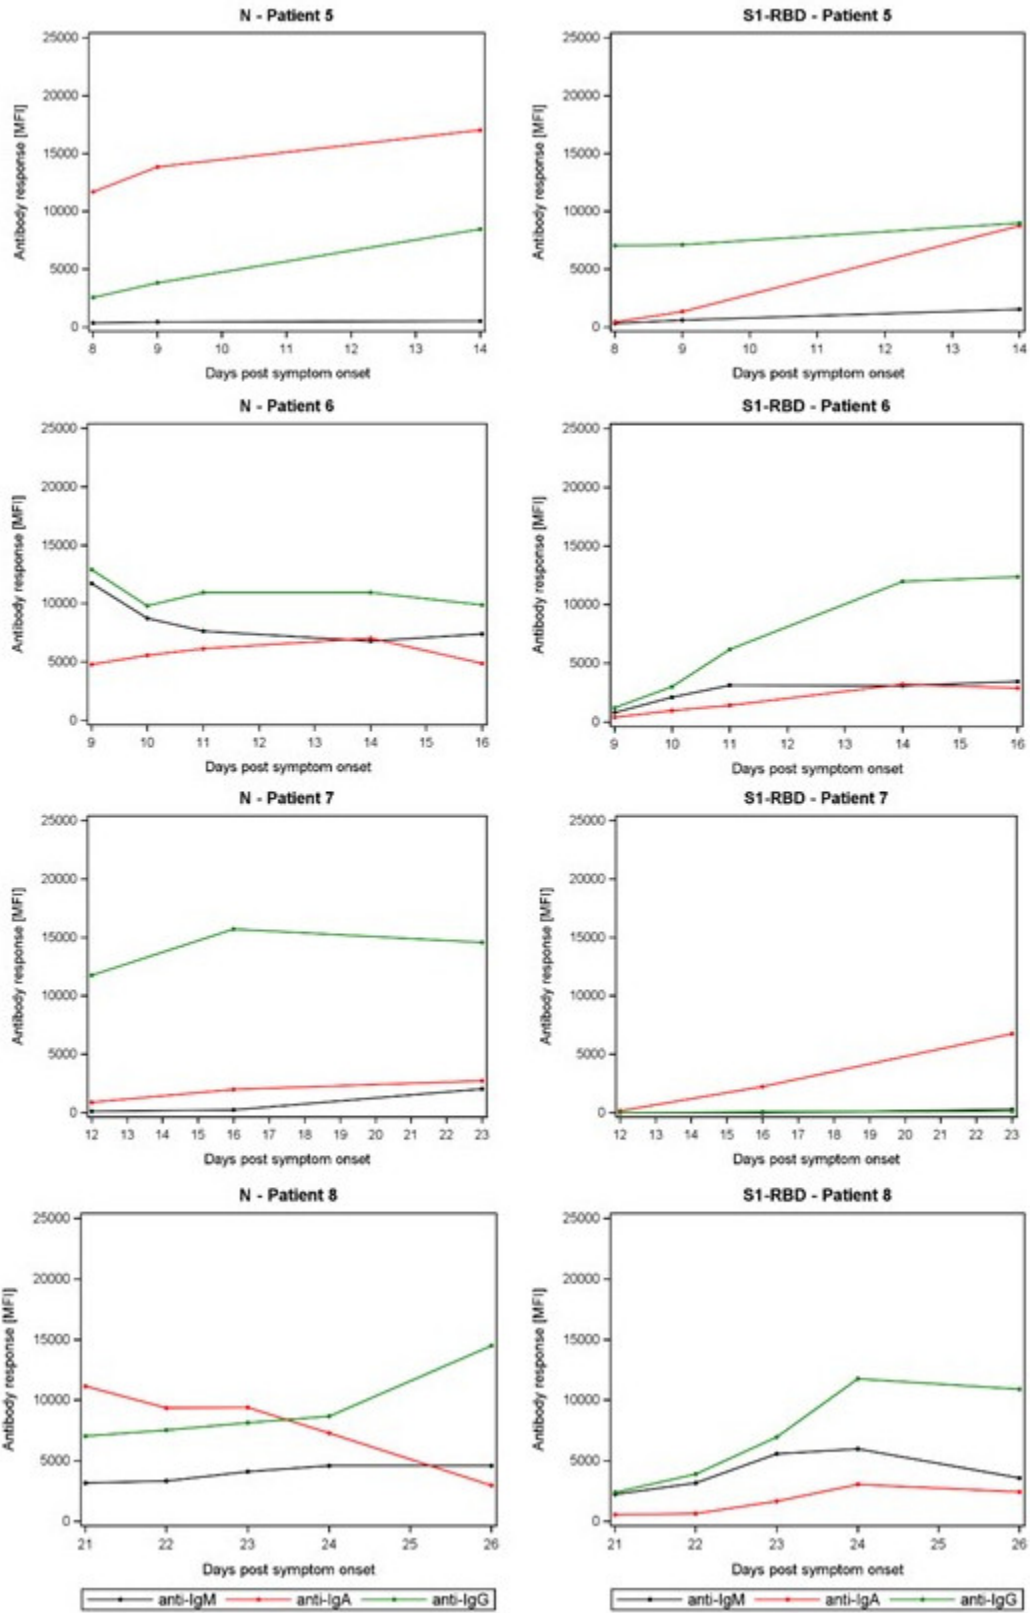

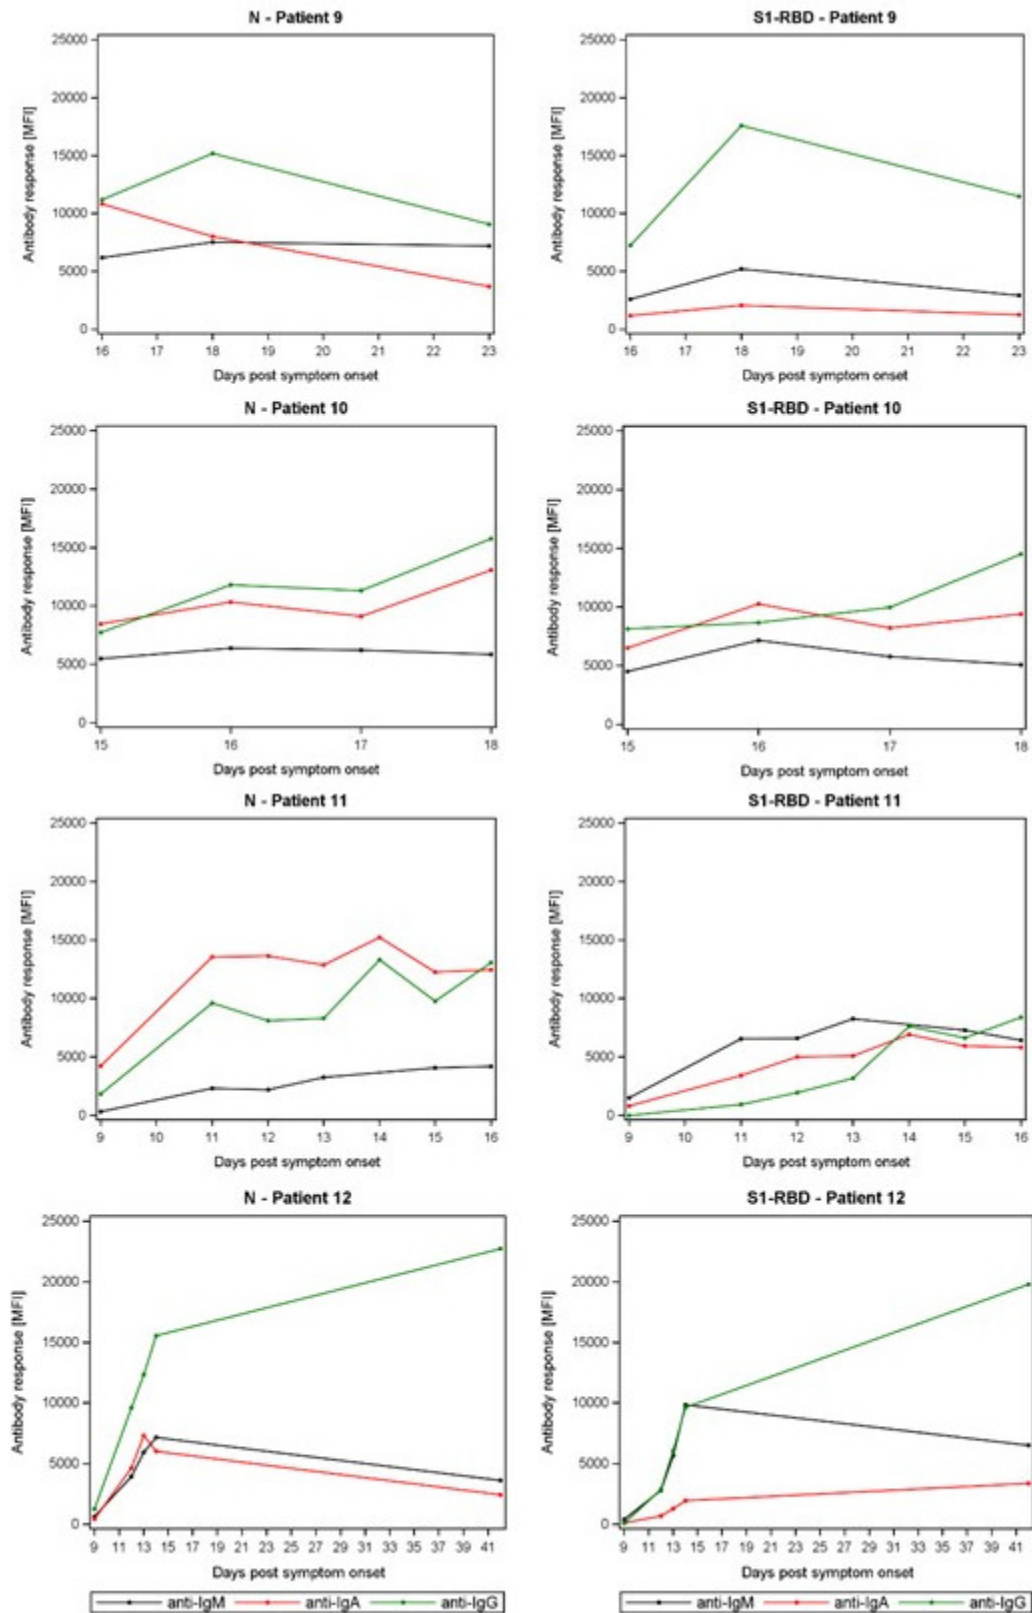

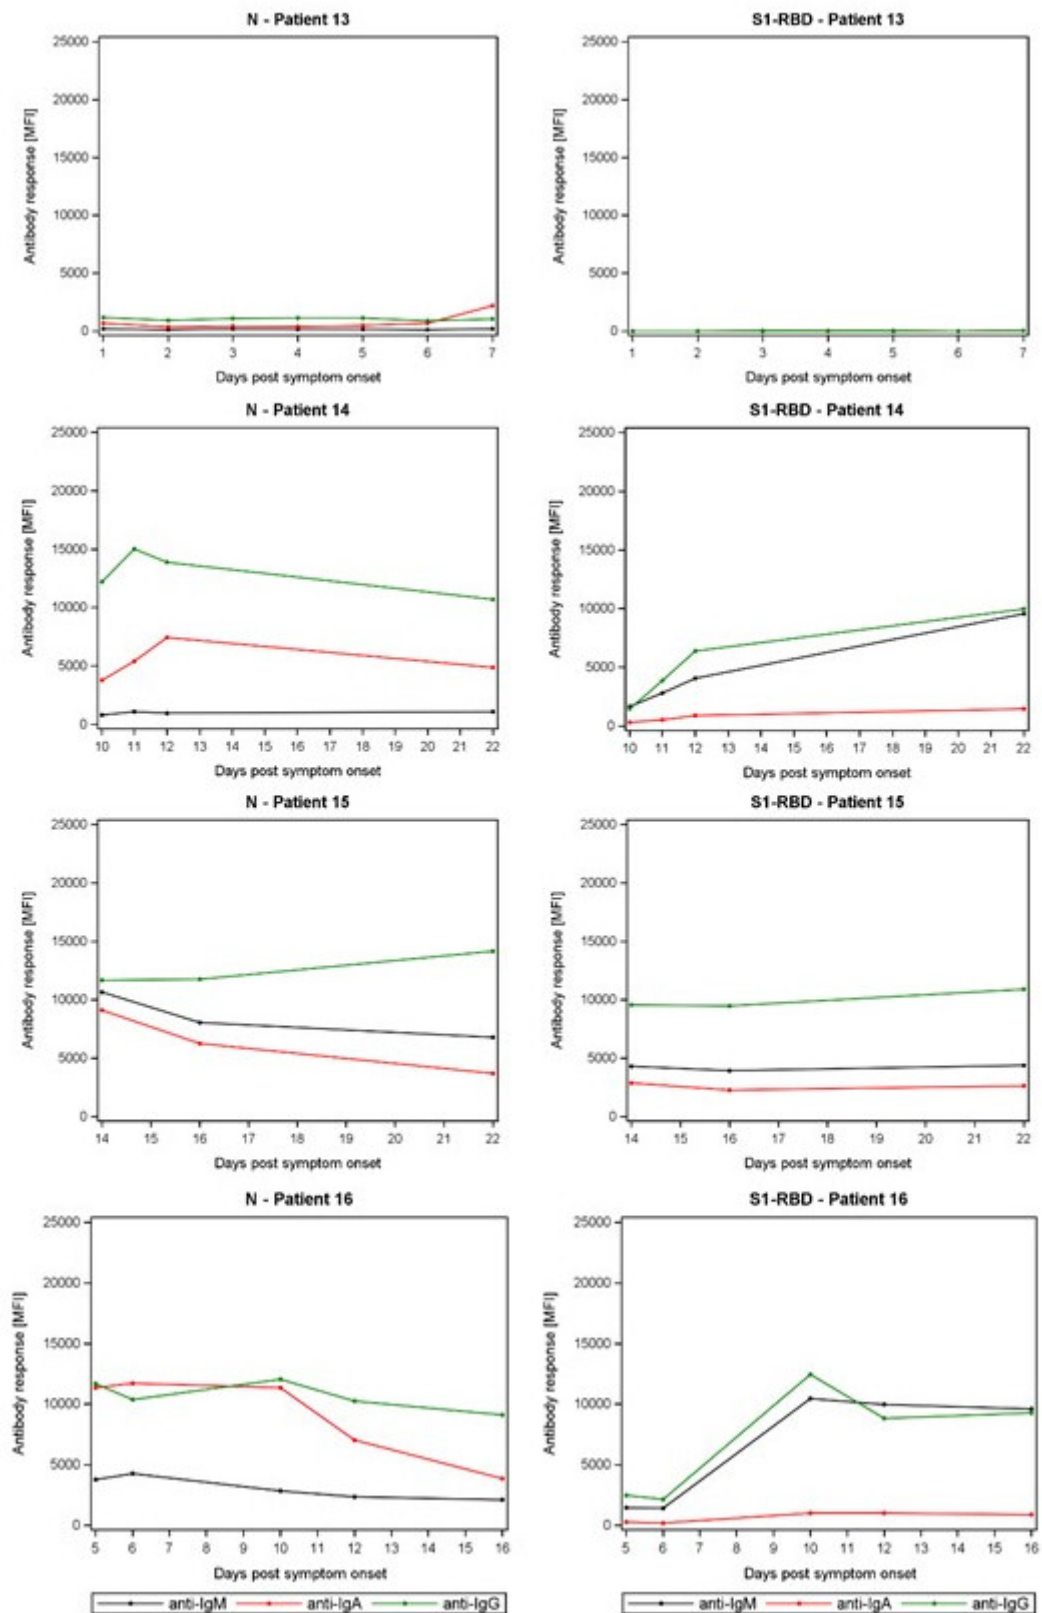

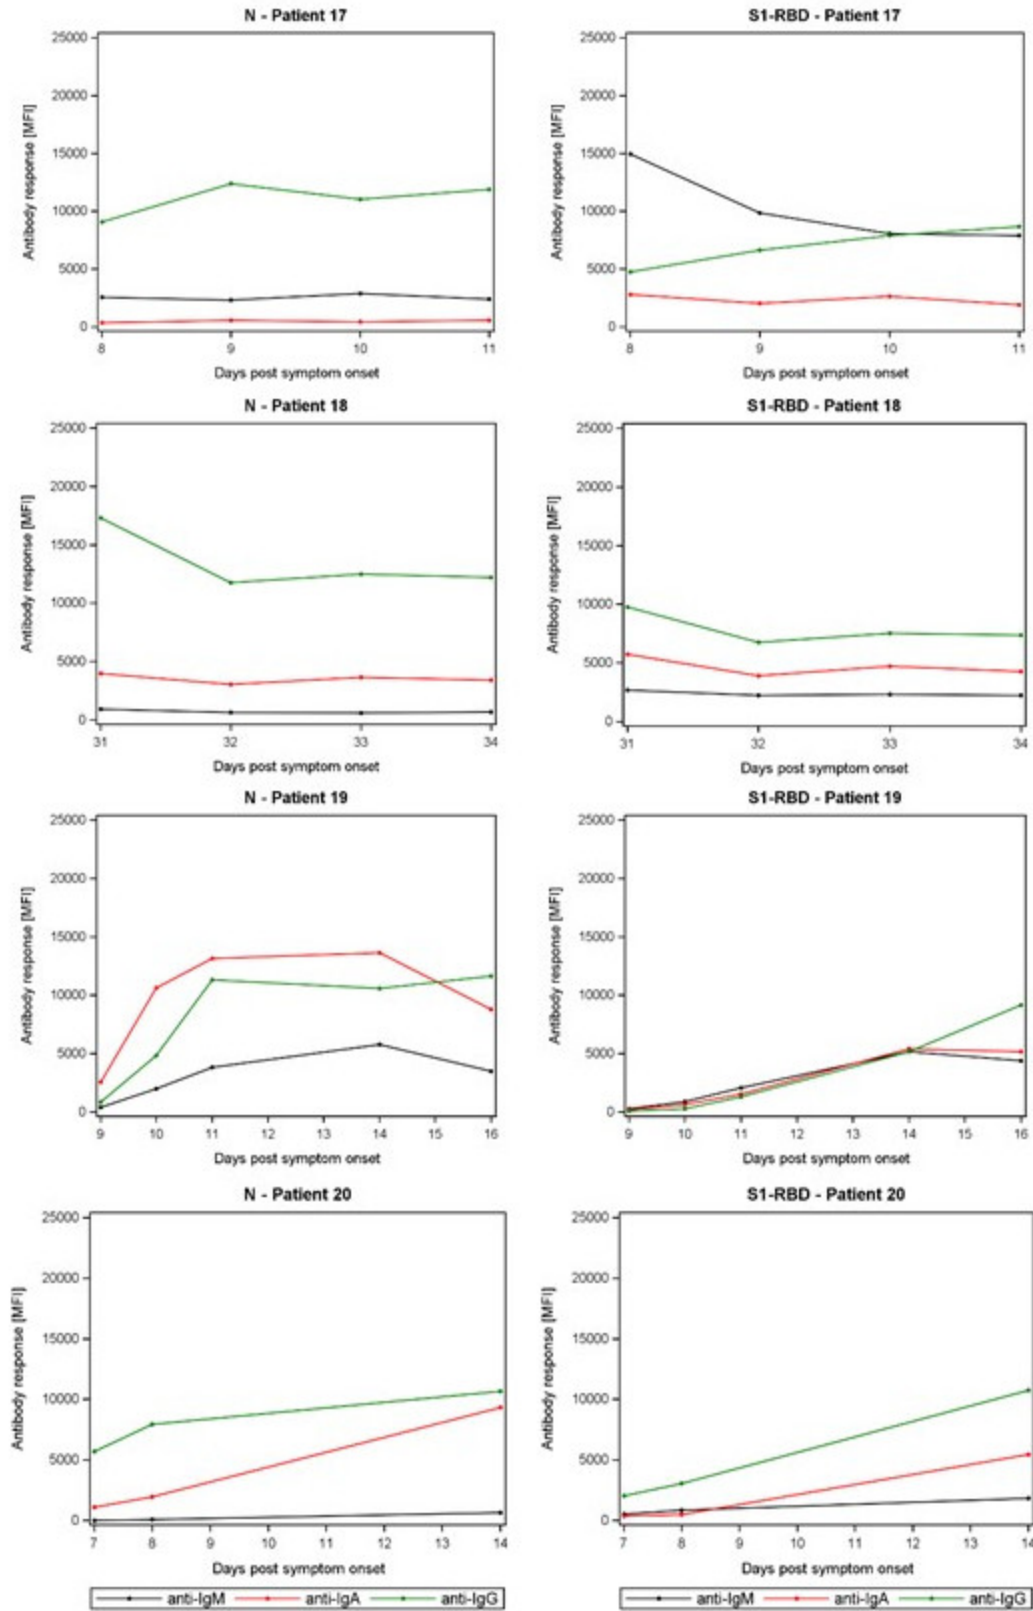

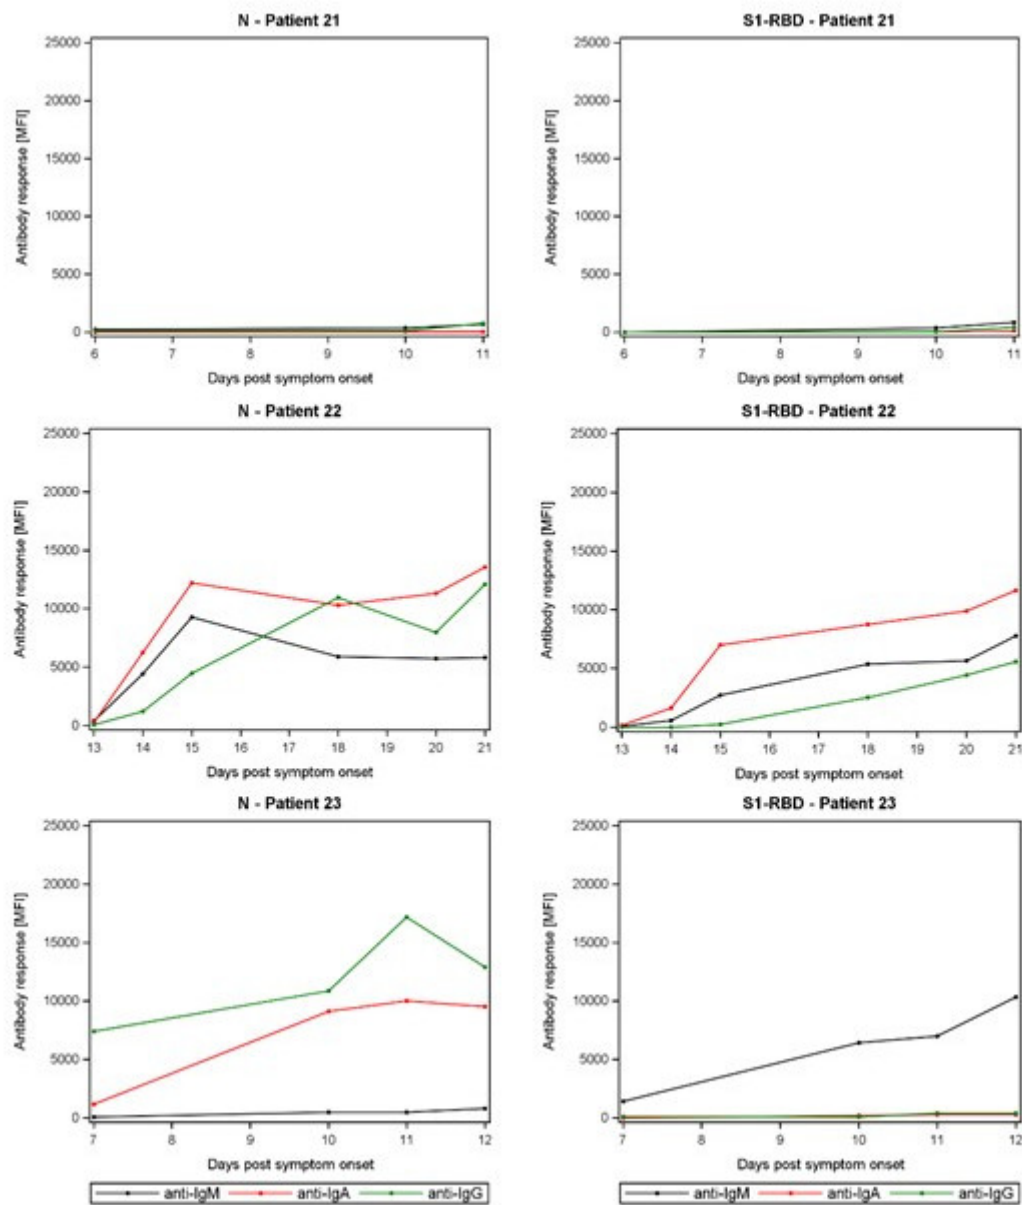

**Figure S4.** Antibody response of different immunoglobulin isotypes (M, A, and G) to SARS-CoV-2 proteins N and S1-RBD in the 23 Covid-19 patients with at least 3 longitudinal samples. The IgM, IgA, and IgG antibody response (MFI) is plotted against days post symptom onset.
